# Supplementary material for: Accelerometer-Based Sedentary Time, Physical Activity, and Serum Metabolome in Young Men
Source: MDPI journal article supplement (doi:10.3390/metabo12080700), 2022-07-27
Supplement: s1 [file s1]

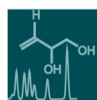

Table S1: The descriptive (mean, standard deviation (sd) and 95% confidence interval (CI)) characteristics for serum metabolome measures

| Metabolome measure                        |  | Mean (sd)                                       | 95% CI                                      | Metabolome measure          | Mean (sd)     | 95% CI        |
|-------------------------------------------|--|-------------------------------------------------|---------------------------------------------|-----------------------------|---------------|---------------|
| <b>Lipoprotein particle concentration</b> |  |                                                 |                                             | <b>Apolipoproteins</b>      |               |               |
| Extremely large VLDL                      |  | $9.2 \times 10^{-11}$ ( $9.3 \times 10^{-11}$ ) | $8.2 \times 10^{-11} - 1.0 \times 10^{-10}$ | ApoA1                       | 1.32 (0.13)   | 1.31 – 1.33   |
| Very large VLDL                           |  | $4.4 \times 10^{-10}$ ( $5.3 \times 10^{-10}$ ) | $3.8 \times 10^{-10} - 5.0 \times 10^{-10}$ | ApoB                        | 0.78 (0.18)   | 0.76 – 0.80   |
| Large VLDL                                |  | $3.4 \times 10^{-09}$ ( $3.1 \times 10^{-09}$ ) | $3.0 \times 10^{-09} - 3.7 \times 10^{-09}$ | ApoB ApoA1 ratio            | 0.59 (0.14)   | 0.58 – 0.61   |
| Medium VLDL                               |  | $1.4 \times 10^{-08}$ ( $7.9 \times 10^{-09}$ ) | $1.3 \times 10^{-08} - 1.5 \times 10^{-08}$ |                             |               |               |
| Small VLDL                                |  | $2.5 \times 10^{-08}$ ( $9.3 \times 10^{-09}$ ) | $2.4 \times 10^{-08} - 2.6 \times 10^{-08}$ | <b>Cholesterol</b>          |               |               |
| Very small VLDL                           |  | $3.4 \times 10^{-08}$ ( $8.4 \times 10^{-09}$ ) | $3.3 \times 10^{-08} - 3.5 \times 10^{-08}$ | Total cholesterol           | 3.77 (0.79)   | 3.69 – 3.86   |
| IDL                                       |  | $9.3 \times 10^{-08}$ ( $2.4 \times 10^{-08}$ ) | $9.0 \times 10^{-08} - 9.5 \times 10^{-08}$ | VLDL-C a                    | 0.58 (0.23)   | 0.55 – 0.60   |
| Large LDL                                 |  | $1.5 \times 10^{-07}$ ( $4.2 \times 10^{-08}$ ) | $1.5 \times 10^{-07} - 1.6 \times 10^{-07}$ | IDL-C                       | 0.60 (0.17)   | 0.58 – 0.62   |
| Medium LDL                                |  | $1.2 \times 10^{-07}$ ( $3.7 \times 10^{-08}$ ) | $1.2 \times 10^{-07} - 1.3 \times 10^{-07}$ | LDL-C                       | 1.41 (0.45)   | 1.36 – 1.46   |
| Small LDL                                 |  | $1.4 \times 10^{-07}$ ( $4.1 \times 10^{-08}$ ) | $1.4 \times 10^{-07} - 1.5 \times 10^{-07}$ | HDL-C                       | 1.19 (0.23)   | 1.16 – 1.21   |
| Very large HDL                            |  | $3.7 \times 10^{-07}$ ( $1.4 \times 10^{-07}$ ) | $3.5 \times 10^{-07} - 3.8 \times 10^{-07}$ | HDL2-C                      | 0.70 (0.22)   | 0.68 – 0.72   |
| Large HDL                                 |  | $8.0 \times 10^{-07}$ ( $3.5 \times 10^{-07}$ ) | $7.7 \times 10^{-07} - 8.4 \times 10^{-07}$ | HDL3-C                      | 0.488 (0.023) | 0.486 – 0.491 |
| Medium HDL                                |  | $1.6 \times 10^{-06}$ ( $2.5 \times 10^{-07}$ ) | $1.6 \times 10^{-06} - 1.6 \times 10^{-06}$ | Esterified cholesterol      | 2.69 (0.57)   | 2.63 – 2.76   |
| Small HDL                                 |  | $4.6 \times 10^{-06}$ ( $3.7 \times 10^{-07}$ ) | $4.5 \times 10^{-06} - 4.6 \times 10^{-06}$ | Free cholesterol            | 1.08 (0.22)   | 1.05 – 1.10   |
| <b>Fatty acids</b>                        |  |                                                 |                                             | <b>Metabolic substrates</b> |               |               |
| Total fatty acids                         |  | 9.1 (1.9)                                       | 8.9 – 9.3                                   | Glucose                     | 4.02 (0.35)   | 3.98 – 4.06   |
| Unsaturation degree                       |  | 1.23 (0.04)                                     | 1.22 – 1.23                                 | Glycerola                   | 0.067 (0.021) | 0.065 – 0.070 |
| Omega-3 FA                                |  | 0.34 (0.10)                                     | 0.33 – 0.35                                 | Acetoacetatea               | 0.098 (0.072) | 0.090 – 0.106 |
| Omega-3 FA ratio                          |  | 3.72 (0.57)                                     | 3.65 – 3.78                                 | 3-hydroxybuturate           | 0.18 (0.13)   | 0.17 – 0.20   |
| Docosahexaenoic acid                      |  | 0.090 (0.032)                                   | 0.086 – 0.093                               | Acetate                     | 0.044 (0.010) | 0.042 – 0.045 |
| Polyunsaturated FA                        |  | 3.63 (0.65)                                     | 3.56 – 3.70                                 | Citrate                     | 0.106 (0.011) | 0.105 – 0.107 |
| Omega-6 FA                                |  | 3.29 (0.56)                                     | 3.23 – 3.35                                 | Lactatea                    | 0.90 (0.25)   | 0.88 – 0.93   |
| Omega-6 FA ratio                          |  | 36.4 (2.4)                                      | 36.1 – 36.6                                 | Pyruvate                    | 0.078 (0.015) | 0.076 – 0.080 |
| Linoleic acid                             |  | 2.84 (0.48)                                     | 2.79 – 2.90                                 | <b>Amino acids</b>          |               |               |
| Saturated FAa                             |  | 3.10 (0.67)                                     | 3.03 – 3.18                                 | Isoleucine (BCAA)           | 0.057 (0.013) | 0.056 – 0.058 |
| Saturated FA ratio                        |  | 34.0 (1.0)                                      | 33.9 – 34.1                                 | Leucine (BCAA)              | 0.083 (0.013) | 0.081 – 0.084 |
| Monounsaturated FA                        |  | 2.39 (0.68)                                     | 2.32 – 2.47                                 | Valine                      | 0.182 (0.025) | 0.179 – 0.184 |
| <b>Lipoprotein particle size</b>          |  |                                                 |                                             | Alanine                     | 0.359 (0.047) | 0.354 – 0.364 |

|                      |               |               |                      |               |               |
|----------------------|---------------|---------------|----------------------|---------------|---------------|
| VLDL diameter        | 36.4 (1.2)    | 36.3 – 36.5   | Glutamine            | 0.520 (0.068) | 0.512 – 0.528 |
| LDL diameter         | 23.6 (0.1)    | 23.6 – 23.6   | Glycinea             | 0.231 (0.028) | 0.228 – 0.234 |
| HDL diameter         | 9.82 (0.2)    | 9.79 – 9.84   | Histidine            | 0.068 (0.007) | 0.068 – 0.069 |
| <b>Triglycerides</b> |               |               | Phenylalaninea       | 0.068 (0.008) | 0.067 – 0.069 |
|                      |               |               | Tyrosine             | 0.051 (0.009) | 0.051 – 0.052 |
|                      |               |               | <b>Miscellaneous</b> |               |               |
|                      |               |               |                      |               |               |
| Total triglycerides  | 1.02 (0.45)   | 0.97 – 1.07   |                      |               |               |
| VLDL TG              | 0.70 (0.39)   | 0.65 – 0.74   |                      |               |               |
| IDL TG               | 0.086 (0.022) | 0.084 – 0.088 | Glycoproteins        | 1.24 (0.17)   | 1.23 – 1.26   |
| LDL TG               | 0.13 (0.04)   | 0.12 – 0.13   | Creatinine           | 0.069 (0.008) | 0.068 – 0.070 |
| HDL TG               | 0.11 (0.03)   | 0.11 – 0.12   | Albumin              | 0.089 (0.005) | 0.088 – 0.089 |

Table S2: Standardized single regression coefficients ( $\beta$ ) of sedentary time and physical activity intensities with their 95% confidence intervals (CI) from age-adjusted linear regression models for serum metabolome

| Metabolome measure                        | Sedentary time        |         | Light intensity physical activity |         | Moderate physical activity |         | Vigorous physical activity |         | Moderate-to-vigorous physical activity |         |
|-------------------------------------------|-----------------------|---------|-----------------------------------|---------|----------------------------|---------|----------------------------|---------|----------------------------------------|---------|
|                                           | $\beta$ (95% CI)      | p-value | $\beta$ (95% CI)                  | p-value | $\beta$ (95% CI)           | p-value | $\beta$ (95% CI)           | p-value | $\beta$ (95% CI)                       | p-value |
| <b>Lipoprotein particle concentration</b> |                       |         |                                   |         |                            |         |                            |         |                                        |         |
| ‡Extremely large VLDL (mmol/l)            | 0.052 (0.050; 0.153)  | 0.318   | -0.045 (-0.146; 0.055)            | 0.373   | -0.042 (-0.150; 0.066)     | 0.444   | -0.114 (-0.210; -0.020)    | 0.018   | -0.047 (-0.152; 0.059)                 | 0.383   |
| ‡Very large VLDL (mmol/l)                 | 0.014 (-0.100; 0.128) | 0.808   | -0.018 (-0.134; 0.100)            | 0.757   | -0.007; (-0.121; 0.107)    | 0.148   | -0.079 (-0.186; 0.028)     | 0.148   | -0.009 (-0.122; 0.105)                 | 0.881   |
| ‡Large VLDL (mmol/l)                      | 0.011 (-0.101; 0.122) | 0.849   | -0.010 (-0.117; 0.097)            | 0.854   | 0.005 (-0.101; 0.110)      | 0.930   | -0.120 (-0.224; -0.016)    | 0.024   | -0.011 (-0.122; 0.101)                 | 0.826   |
| ‡Medium VLDL (mmol/l)                     | 0.038 (-0.088; 0.164) | 0.550   | -0.031 (-0.156; 0.094)            | 0.626   | -0.036 (-0.161; 0.088)     | 0.567   | -0.109 (-0.225; 0.007)     | 0.066   | -0.053 (-0.180; 0.074)                 | 0.413   |
| Small VLDL (mmol/l)                       | 0.073 (-0.025; 0.170) | 0.143   | -0.067 (-0.164; 0.031)            | 0.179   | -0.051 (-0.149; 0.047)     | 0.306   | -0.088 (-0.185; 0.009)     | 0.077   | -0.065 (-0.162; 0.033)                 | 0.194   |
| Very small VLDL (mmol/l)                  | 0.112 (0.014; 0.211)  | 0.026   | -0.091 (-0.190; 0.007)            | 0.071   | -0.110 (-0.209; -0.011)    | 0.029   | -0.057 (-0.157; 0.041)     | 0.255   | -0.116 (-0.215; -0.017)                | 0.022   |
| IDL (mmol/l)                              | 0.114 (0.012; 0.215)  | 0.028   | -0.089 (-0.190; 0.012)            | 0.084   | -0.119 (-0.220; -0.017)    | 0.021   | -0.039 (-0.140; 0.063)     | 0.457   | -0.120 (-0.222; -0.020)                | 0.019   |
| Large LDL (mmol/l)                        | 0.106 (0.005; 0.208)  | 0.040   | -0.083 (-0.184; 0.019)            | 0.112   | -0.113 (-0.215; -0.011)    | 0.029   | -0.035 (-0.137; 0.067)     | 0.499   | -0.115 (-0.216; -0.013)                | 0.027   |

|                           |          |                        |       |                        |       |                         |       |                         |         |                         |       |
|---------------------------|----------|------------------------|-------|------------------------|-------|-------------------------|-------|-------------------------|---------|-------------------------|-------|
| Medium (mmol/l)           | LDL      | 0.102 (0.001; 0.204)   | 0.048 | -0.079 (-0.180; 0.023) | 0.129 | -0.109 (-0.210; -0.007) | 0.036 | -0.038 (-0.140; 0.064)  | 0.462   | -0.111 (-0.212; -0.010) | 0.032 |
| Small (mmol/l)            | LDL      | 0.097 (-0.005; 0.198)  | 0.062 | -0.077 (-0.179; 0.024) | 0.136 | -0.100 (-0.201; 0.002)  | 0.055 | -0.033 (-0.135; 0.069)  | 0.524   | -0.101 (-0.203; 0.001)  | 0.050 |
| Very large (mmol/l)       | HDL      | -0.026 (-0.134; 0.083) | 0.640 | -0.016 (-0.124; 0.092) | 0.775 | 0.053 (-0.056; 0.161)   | 0.342 | 0.054 (0.038; 0.251)    | 0.008   | 0.077 (-0.032; 0.185)   | 0.166 |
| Large (mmol/l)            | HDL      | -0.101 (-0.210; 0.008) | 0.069 | 0.049 (-0.060; 0.159)  | 0.375 | 0.120 (0.011; 0.229)    | 0.031 | 0.184 (0.077; 0.292)    | 0.001 * | 0.148 (0.039; 0.256)    | 0.008 |
| Medium (mmol/l)           | HDL      | -0.080 (-0.189; 0.029) | 0.151 | 0.055 (-0.054; 0.164)  | 0.322 | 0.076 (-0.033; 0.186)   | 0.169 | 0.122 (0.014; 0.231)    | 0.027   | 0.095 (-0.014; 0.204)   | 0.087 |
| Small (mmol/l)            | HDL      | 0.014 (-0.097; 0.124)  | 0.805 | 0.006 (-0.105; 0.116)  | 0.919 | -0.029 (-0.139; 0.082)  | 0.612 | -0.056 (-0.166; 0.055)  | 0.322   | -0.037 (-0.148; 0.073)  | 0.508 |
| Lipoprotein particle size |          |                        |       |                        |       |                         |       |                         |         |                         |       |
| VLDL (nm)                 | diameter | 0.027 (-0.084; 0.139)  | 0.629 | -0.027 (-0.138; 0.084) | 0.634 | -0.003 (-0.114; 0.109)  | 0.961 | -0.107 (-0.218; 0.003)  | 0.057   | -0.022 (-0.133; 0.090)  | 0.701 |
| LDL (nm)                  | diameter | 0.005 (-0.104; 0.114)  | 0.927 | 0.013 (-0.095; 0.122)  | 0.812 | -0.033 (-0.141; 0.076)  | 0.555 | 0.016 (-0.093; 0.124)   | 0.778   | -0.028 (-0.137; 0.080)  | 0.606 |
| HDL (nm)                  | diameter | -0.082 (-0.192; 0.027) | 0.141 | 0.034 (-0.076; 0.144)  | 0.543 | 0.101 (-0.008; 0.211)   | 0.070 | 0.179 (0.071; 0.288)    | 0.001 * | 0.129 (0.020; 0.238)    | 0.021 |
| Apolipoproteins           |          |                        |       |                        |       |                         |       |                         |         |                         |       |
| ApoA1 (g/l)               |          | -0.069 (-0.180; 0.043) | 0.227 | 0.023 (-0.089; 0.134)  | 0.691 | 0.091 (-0.021; 0.202)   | 0.110 | 0.159 (0.049; 0.269)    | 0.005   | 0.115 (0.004; 0.226)    | 0.042 |
| ApoB (g/l)                |          | 0.098 (-0.003; 0.200)  | 0.058 | -0.085 (-0.187; 0.017) | 0.100 | -0.085 (-0.187; 0.017)  | 0.101 | -0.069 (-0.171; 0.033)  | 0.182   | -0.094 (-0.196; 0.008)  | 0.070 |
| ApoB ApoA1 ratio          |          | 0.123 (0.021; 0.225)   | 0.018 | -0.094 (-0.196; 0.008) | 0.072 | -0.116 (-0.218; -0.014) | 0.026 | -0.132 (-0.234; -0.030) | 0.026   | -0.135 (-0.237; -0.033) | 0.010 |
| Triglycerides             |          |                        |       |                        |       |                         |       |                         |         |                         |       |

|                                 |                        |         |                         |       |                         |         |                         |         |                         |          |
|---------------------------------|------------------------|---------|-------------------------|-------|-------------------------|---------|-------------------------|---------|-------------------------|----------|
| ‡Total triglycerides (mmol/l)   | 0.054 (-0.072; 0.180)  | 0.399   | -0.046 (-0.175; 0.083)  | 0.488 | -0.055 (-0.185; 0.076)  | 0.090   | -0.105 (-0.226; 0.017)  | 0.090   | -0.074 (-0.204; 0.056)  | 0.263    |
| ‡VLDL TG (mmol/l)               | 0.037 (-0.081; 0.154)  | 0.542   | -0.025 (-0.144; 0.093)  | 0.673 | -0.030 (-0.150; 0.088)  | 0.612   | -0.129 (-0.245; -0.012) | 0.030   | -0.060 (-0.181; 0.060)  | 0.325    |
| IDL TG (mmol/l)                 | 0.161 (0.069; 0.252)   | 0.001 * | -0.125 (-0.217; -0.033) | 0.008 | -0.164 (-0.256; -0.072) | 0.001 * | -0.086 (-0.179 ; 0.006) | 0.068   | -0.173 (-0.264; -0.081) | <0.001 * |
| LDL TG (mmol/l)                 | 0.144 (0.052; 0.236)   | 0.002 * | -0.113 (-0.205; -0.021) | 0.017 | -0.145 (-0.237; -0.053) | 0.002 * | -0.078 (-0.170; 0.0142) | 0.097   | -0.153 (-0.245; -0.061) | 0.001 *  |
| HDL TG (mmol/l)                 | 0.030 (-0.066; 0.125)  | 0.541   | -0.042 (-0.137; 0.053)  | 0.388 | 0.004 (-0.091; 0.100)   | 0.927   | -0.059 (-0.154; 0.035)  | 0.219   | -0.006 (-0.102; 0.089)  | 0.896    |
| <b>Cholesterol</b>              |                        |         |                         |       |                         |         |                         |         |                         |          |
| Total cholesterol (mmol/l)      | 0.077 (-0.027; 0.180)  | 0.145   | -0.070 (-0.173; 0.034)  | 0.185 | -0.073 (-0.176; 0.031)  | 0.169   | 0.005 (-0.099; 0.108)   | 0.932   | -0.069 (-0.172; 0.035)  | 0.192    |
| VLDL-C (mmol/l)                 | 0.071 (-0.031; 0.174)  | 0.173   | -0.067 (-0.170; 0.035)  | 0.198 | -0.048 (-0.151; 0.054)  | 0.355   | -0.080 (-0.182; 0.023)  | 0.127   | -0.061 (-0.163; 0.042)  | 0.246    |
| IDL-C (mmol/l)                  | 0.108 (0.006; 0.211)   | 0.038   | -0.086 (-0.189; 0.017)  | 0.100 | -0.113 (-0.216; -0.011) | 0.031   | -0.031 (-0.134; 0.072)  | 0.558   | -0.114 (-0.216; -0.011) | 0.029    |
| LDL-C (mmol/l)                  | 0.101 (-0.001; 0.204)  | 0.052   | -0.078 (-0.181; 0.024)  | 0.136 | -0.109 (-0.212; -0.007) | 0.036   | -0.029 (-0.132; 0.073)  | 0.574   | -0.110 (-0.213; -0.007) | 0.035    |
| HDL-C (mmol/l)                  | -0.084 (-0.194; 0.027) | 0.137   | 0.041 (-0.069; 0.152)   | 0.460 | 0.094 (-0.016; 0.205)   | 0.094   | 0.176 (0.067; 0.284)    | 0.002 * | 0.122 (0.012; 0.232)    | 0.030    |
| HDL2-C (mmol/l)                 | -0.091 (-0.201; 0.019) | 0.103   | 0.049 (-0.061; 0.159)   | 0.382 | 0.100 (-0.010; 0.209)   | 0.074   | 0.178 (0.070; 0.286)    | 0.001 * | 0.127 (0.018; 0.237)    | 0.022    |
| HDL3-C (mmol/l)                 | 0.029 (-0.077; 0.134)  | 0.593   | -0.048 (-0.154; 0.057)  | 0.364 | -0.006 (-0.112; 0.099)  | 0.899   | 0.063 (-0.042; 0.168)   | 0.242   | 0.005 (-0.101; 0.110)   | 0.931    |
| Esterified cholesterol (mmol/l) | 0.076 (-0.028; 0.179)  | 0.151   | -0.069 (-0.172; 0.035)  | 0.193 | -0.072 (-0.176; 0.031)  | 0.171   | 0.007 (-0.097; 0.111)   | 0.890   | -0.068 (-0.172; 0.036)  | 0.197    |
| Free cholesterol (mmol/l)       | 0.078 (-0.024; 0.181)  | 0.135   | -0.071 (-0.174; 0.031)  | 0.172 | -0.072 (-0.175; 0.031)  | 0.168   | -0.003 (-0.106; 0.100)  | 0.960   | -0.070 (-0.172; 0.033)  | 0.183    |
| <b>Fatty acids</b>              |                        |         |                         |       |                         |         |                         |         |                         |          |
| Total fatty acids (mmol/l)      | 0.063 (-0.040; 0.166)  | 0.228   | -0.069 (-0.171; 0.034)  | 0.187 | -0.037 (-0.140; 0.066)  | 0.481   | -0.031 (-0.134; 0.072)  | 0.551   | -0.041 (-0.143; 0.062)  | 0.435    |

|                               |      |                        |          |                         |       |                         |       |                        |         |                         |       |
|-------------------------------|------|------------------------|----------|-------------------------|-------|-------------------------|-------|------------------------|---------|-------------------------|-------|
| Unsaturation degree           |      | -0.088 (-0.198; 0.022) | 0.115    | 0.066 (-0.044; 0.176)   | 0.237 | 0.070 (-0.040; 0.180)   | 0.209 | 0.172 (0.063; 0.280)   | 0.002 * | 0.098 (-0.012; 0.207)   | 0.081 |
| Omega-3 (mmol/l)              | FA   | 0.027 (-0.076; 0.130)  | 0.608    | -0.038 (-0.141; 0.064)  | 0.463 | -0.012 (-0.115; 0.091)  | 0.814 | 0.037 (-0.066; 0.140)  | 0.480   | -0.005 (-0.108; 0.098)  | 0.920 |
| Omega-3 FA ratio              |      | -0.037 (-0.146; 0.073) | 0.509    | 0.014 (-0.096; 0.123)   | 0.806 | 0.041 (-0.069; 0.150)   | 0.466 | 0.117 (0.009; 0.226)   | 0.035   | 0.060 (-0.050; 0.169)   | 0.284 |
| Docosahexaenoic acid (mmol/l) |      | 0.056 (-0.047; 0.159)  | 0.283    | -0.069 (-0.171; 0.034)  | 0.191 | -0.035 (-0.139; 0.068)  | 0.501 | 0.038 (-0.066; 0.141)  | 0.472   | -0.027 (-0.130; 0.076)  | 0.604 |
| Polyunsaturated FA (mmol/l)   |      | 0.055 (-0.048; 0.157)  | 0.295    | -0.062 (-0.165; 0.041)  | 0.236 | -0.037 (-0.140; 0.066)  | 0.480 | 0.015 (-0.088; 0.119)  | 0.770   | -0.033 (-0.136; 0.070)  | 0.531 |
| Omega-6 (mmol/l)              | FA   | 0.059 (-0.044; 0.162)  | 0.263    | -0.065 (-0.168; 0.038)  | 0.215 | -0.041 (-0.144; 0.062)  | 0.438 | 0.011 (-0.092; 0.114)  | 0.833   | -0.037 (-0.140; 0.066)  | 0.480 |
| Omega-6 FA ratio              |      | -0.062 (-0.170; 0.047) | 0.263    | 0.056 (-0.053; 0.164)   | 0.314 | 0.035 (-0.074; 0.144)   | 0.524 | 0.127 (0.019; 0.235)   | 0.022   | 0.056 (-0.053; 0.165)   | 0.310 |
| Linoleic acid (mmol/l)        | acid | 0.052 (-0.052; 0.156)  | 0.326    | -0.060 (-0.164; 0.043)  | 0.254 | -0.032 (-0.136; 0.072)  | 0.543 | 0.011 (-0.094; 0.115)  | 0.842   | -0.029 (-0.133; 0.075)  | 0.584 |
| Saturated (mmol/l)            | FA   | 0.080 (-0.023; 0.183)  | 0.127    | -0.084 (-0.187; 0.019)  | 0.108 | -0.052 (-0.155; 0.051)  | 0.319 | -0.035 (-0.138; 0.068) | 0.507   | -0.056 (-0.159; 0.047)  | 0.284 |
| Saturated FA ratio            |      | 0.144 (0.033; 0.254)   | 0.011    | -0.128 (-0.239; -0.017) | 0.023 | -0.131 (-0.242; -0.020) | 0.021 | -0.036 (-0.148; 0.077) | 0.533   | -0.132 (-0.243; -0.021) | 0.020 |
| Monounsaturated FA (mmol/l)   |      | 0.048 (-0.056; 0.152)  | 0.369    | -0.053 (-0.158; 0.051)  | 0.313 | -0.018 (-0.122; 0.087)  | 0.740 | -0.069 (-0.174; 0.035) | 0.194   | -0.029 (-0.133; 0.075)  | 0.584 |
| <b>Metabolic substrates</b>   |      |                        |          |                         |       |                         |       |                        |         |                         |       |
| Glucose (mmol/l)              |      | -0.097 (-0.195; 0.001) | 0.052    | 0.115 (0.017; 0.212)    | 0.021 | 0.063 (-0.035; 0.162)   | 0.208 | -0.051 (-0.149; 0.047) | 0.308   | 0.051 (-0.047; 0.150)   | 0.306 |
| Glycerola (mmol/l)            |      | 0.107 (0.002; 0.212)   | 0.046    | -0.064 (-0.169; 0.042)  | 0.236 | -0.127 (-0.232; -0.022) | 0.017 | -0.104 (-0.209; 0.001) | 0.051   | -0.141 (-0.245; -0.036) | 0.009 |
| Acetoacetatea (mmol/l)        |      | 0.190 (0.089; 0.291)   | <0.001 * | -0.144 (-0.248; -0.041) | 0.006 | -0.144 (-0.247; -0.040) | 0.007 | -0.090 (-0.190; 0.010) | 0.079   | -0.148 (-0.254; -0.041) | 0.007 |

|                             |                         |          |                         |          |                         |         |                         |         |                         |         |
|-----------------------------|-------------------------|----------|-------------------------|----------|-------------------------|---------|-------------------------|---------|-------------------------|---------|
| ‡3-hydroxybutyrate (mmol/l) | 0.137 (0.060; 0.213)    | 0.001 *  | -0.117 (-0.189; 0.044)  | 0.002 *  | -0.128 (-0.203; -0.053) | 0.001 * | -0.031 (-0.103; 0.042)  | 0.409   | -0.130 (-0.206; -0.054) | 0.001 * |
| ‡ Acetate (mmol/l)          | 0.008 (-0.101; 0.117)   | 0.878    | -0.012 (-0.121; 0.097)  | 0.829    | 0.009 (-0.099; 0.117)   | 0.867   | -0.060 (-0.169; 0.048)  | 0.273   | -0.002 (-0.111; 0.107)  | 0.973   |
| Citrate (mmol/l)            | -0.021 (-0.132; 0.092)  | 0.724    | 0.005 (-0.106; 0.117)   | 0.922    | 0.038 (-0.073; 0.150)   | 0.500   | -0.009 (-0.121; 0.102)  | 0.873   | 0.035 (-0.077; 0.147)   | 0.536   |
| Lactate (mmol/l)            | 0.057 (-0.043; 0.157)   | 0.260    | -0.070 (-0.170; 0.029)  | 0.168    | -0.032 (-0.132; 0.068)  | 0.529   | 0.021 (-0.079; 0.121)   | 0.679   | -0.027 (-0.127; 0.073)  | 0.596   |
| Pyruvate (mmol/l)           | 0.018 (-0.079; 0.117)   | 0.709    | 0.038 (-0.060; 0.136)   | 0.448    | -0.073 (-0.170; 0.025)  | 0.145   | -0.116 (-0.213; -0.019) | 0.019   | -0.090 (-0.188; 0.007)  | 0.069   |
| <b>Amino acids</b>          |                         |          |                         |          |                         |         |                         |         |                         |         |
| Isoleucine (BCAA) (mmol/l)  | 0.085 (-0.026; 0.196)   | 0.133    | -0.086 (-0.197; 0.025)  | 0.127    | -0.046 (-0.157; 0.066)  | 0.420   | -0.115 (-0.226; -0.005) | 0.041   | -0.064 (-0.176; 0.047)  | 0.256   |
| Leucine (BCAA) (mmol/l)     | 0.111 (-0.001; 0.221)   | 0.051    | -0.109 (-0.220; 0.002)  | 0.055    | -0.068 (-0.179; 0.044)  | 0.234   | -0.132 (-0.243; -0.022) | 0.019   | -0.088 (-0.200; 0.023)  | 0.119   |
| Valine (mmol/l)             | 0.154 (0.045; 0.263)    | 0.006    | -0.147 (-0.256; -0.038) | 0.008    | -0.121 (-0.231; -0.012) | 0.030   | -0.130 (-0.239; -0.020) | 0.195   | -0.154 (-0.263; -0.045) | 0.020   |
| Alanine (mmol/l)            | -0.002 (-0.112; 0.109)  | 0.978    | -0.015 (-0.125; 0.095)  | 0.784    | 0.036 (-0.074; 0.146)   | 0.516   | -0.061 (-0.171; 0.049)  | 0.273   | 0.024 (-0.086; 0.134)   | 0.669   |
| Glutamine (mmol/l)          | -0.194 (-0.289; -0.098) | <0.001 * | 0.202 (0.107; 0.297)    | <0.001 * | 0.138 (0.041; 0.234)    | 0.005   | 0.035 (-0.062; 0.132)   | 0.483   | 0.138 (0.041; 0.235)    | 0.005   |
| Glycine (mmol/l)            | -0.084 (-0.189; 0.021)  | 0.116    | 0.087 (-0.018; 0.191)   | 0.105    | 0.077 (-0.027; 0.183)   | 0.147   | -0.072 (-0.176; 0.033)  | 0.180   | 0.062 (-0.043; 0.167)   | 0.249   |
| Histidine (mmol/l)          | -0.005 (-0.116; 0.105)  | 0.926    | -0.013 (-0.123; 0.098)  | 0.818    | 0.035 (-0.076; 0.145)   | 0.540   | -0.025 (-0.136; 0.085)  | 0.656   | 0.029 (-0.082; 0.139)   | 0.611   |
| Phenylalanine (mmol/l)      | -0.007 (-0.119; 0.104)  | 0.899    | 0.020 (-0.092; 0.132)   | 0.725    | 0.015 (-0.097; 0.127)   | 0.793   | -0.146 (-0.256; -0.035) | 0.010   | -0.012 (-0.123; 0.100)  | 0.838   |
| Tyrosine (mmol/l)           | -0.073 (-0.184; 0.039)  | 0.201    | 0.069 (-0.042; 0.180)   | 0.224    | 0.082 (-0.030; 0.193)   | 0.151   | -0.097 (-0.208; 0.014)  | 0.087   | 0.061 (-0.051; 0.173)   | 0.283   |
| <b>Miscellaneous</b>        |                         |          |                         |          |                         |         |                         |         |                         |         |
| Glycoproteins (mmol/l)      | 0.037 (-0.069; 0.143)   | 0.491    | -0.002 (-0.108; 0.103)  | 0.965    | -0.048 (-0.155; 0.060)  | 0.383   | -0.171 (-0.275; -0.068) | 0.001 * | -0.077 (-0.184; 0.030)  | 0.157   |
| Creatinine (g/l)            | 0.087 (-0.023; 0.197)   | 0.119    | -0.117 (-0.226; -0.008) | 0.119    | -0.029 (-0.139; 0.081)  | 0.606   | 0.002 (-0.108; 0.112)   | 0.606   | -0.027 (-0.138; 0.083)  | 0.625   |
| Albumin (g/l)               | 0.016 (-0.081; 0.114)   | 0.740    | -0.050 (-0.147; 0.046)  | 0.307    | 0.021 (-0.076; 0.118)   | 0.667   | 0.072 (-0.025; 0.169)   | 0.144   | 0.033 (-0.064; 0.130)   | 0.501   |

‡ Quantile regression models applied, \*  $p \leq 0.002$ .

Table S3: Standardized single regression coefficients ( $\beta$ ) of sedentary time and physical activity intensities with their 95% confidence intervals (CI) from age, education, smoking, alcohol, nutrition and body fat percentage-adjusted linear regression models for serum metabolome

| Metabolome measure                        | Sedentary time        |         | Light intensity<br>physical activity |         | Moderate-to-<br>vigorous physical<br>activity |         |
|-------------------------------------------|-----------------------|---------|--------------------------------------|---------|-----------------------------------------------|---------|
|                                           | $\beta$ (95% CI)      | p-value | $\beta$ (95% CI)                     | p-value | $\beta$ (95% CI)                              | p-value |
| <b>Lipoprotein particle concentration</b> |                       |         |                                      |         |                                               |         |
| ‡ Extremely large VLDL                    | -0.01 (-0.11; 0.09)   | 0.816   | -0.01 (-0.10; 0.09)                  | 0.896   | 0.03 (-0.07; 0.13)                            | 0.532   |
| ‡ Very large VLDL                         | 0.02 (-0.09; 0.13)    | 0.776   | -0.02 (-0.12; 0.09)                  | 0.720   | -0.002 (-0.10; 0.10)                          | 0.970   |
| ‡ Large VLDL                              | 0.02 (-0.08; 0.12)    | 0.667   | -0.02 (-0.13; 0.08)                  | 0.679   | -0.02 (-0.12; 0.08)                           | 0.685   |
| ‡ Medium VLDL                             | 0.01 (-0.09; 0.11)    | 0.854   | -0.03 (-0.14; 0.08)                  | 0.570   | 0.03 (-0.08; 0.13)                            | 0.620   |
| Small VLDL                                | -0.02 (-0.11; 0.07)   | 0.652   | 0.004 (-0.09; 0.10)                  | 0.930   | 0.04 (-0.05; 0.13)                            | 0.411   |
| Very small VLDL                           | 0.03 (-0.07; 0.13)    | 0.551   | -0.03 (-0.13; 0.07)                  | 0.598   | -0.03 (-0.12; 0.07)                           | 0.580   |
| IDL                                       | 0.03 (-0.07; 0.13)    | 0.563   | -0.02 (-0.12; 0.09)                  | 0.765   | -0.04 (-0.14; 0.06)                           | 0.418   |
| Large LDL                                 | 0.02 (-0.08; 0.12)    | 0.672   | -0.01 (-0.11; 0.10)                  | 0.877   | -0.03 (-0.13; 0.07)                           | 0.500   |
| Medium LDL                                | 0.02 (-0.09; 0.12)    | 0.743   | -0.005 (-0.11; 0.10)                 | 0.926   | -0.03 (-0.13; 0.07)                           | 0.576   |
| Small LDL                                 | 0.01 (-0.09; 0.12)    | 0.800   | -0.01 (-0.11; 0.10)                  | 0.920   | -0.02 (-0.12; 0.08)                           | 0.692   |
| Very large HDL                            | 0.01 (-0.10; 0.11)    | 0.906   | -0.03 (-0.14; 0.08)                  | 0.602   | 0.02 (-0.08; 0.13)                            | 0.669   |
| Large HDL                                 | -0.02 (-0.12; 0.08)   | 0.723   | -0.01 (-0.11; 0.10)                  | 0.855   | 0.05 (-0.05; 0.15)                            | 0.332   |
| Medium HDL                                | -0.05 (-0.16; 0.07)   | 0.435   | 0.03 (-0.09; 0.14)                   | 0.658   | 0.06 (-0.05; 0.17)                            | 0.297   |
| Small HDL                                 | -0.04 (-0.15; 0.07)   | 0.517   | 0.04 (-0.08; 0.15)                   | 0.520   | 0.03 (-0.08; 0.14)                            | 0.610   |
| <b>Lipoprotein particle size</b>          |                       |         |                                      |         |                                               |         |
| VLDL diameter                             | -0.05 (-0.16; 0.06)   | 0.395   | 0.03 (-0.09; 0.14)                   | 0.657   | 0.06 (-0.04; 0.17)                            | 0.235   |
| LDL diameter                              | 0.03 (-0.08; 0.14)    | 0.609   | 0.004 (-0.11; 0.12)                  | 0.948   | -0.06 (-0.18; 0.05)                           | 0.254   |
| HDL diameter                              | 0.003 (-0.10; 0.10)   | 0.949   | -0.03 (-0.13; 0.08)                  | 0.632   | 0.02 (-0.07; 0.12)                            | 0.627   |
| <b>Apolipoproteins</b>                    |                       |         |                                      |         |                                               |         |
| ApoA1                                     | -0.05 (-0.17; 0.07)   | 0.405   | 0.01 (-0.10; 0.13)                   | 0.819   | 0.08 (-0.03; 0.20)                            | 0.153   |
| ApoB                                      | -0.003 (-0.10; 0.10)  | 0.953   | -0.002 (-0.10; 0.10)                 | 0.975   | 0.01 (-0.09; 0.10)                            | 0.872   |
| ApoB ApoA1 ratio                          | 0.02 (-0.08; 0.11)    | 0.742   | -0.01 (-0.11; 0.09)                  | 0.861   | -0.02 (-0.12; 0.07)                           | 0.649   |
| <b>Triglycerides</b>                      |                       |         |                                      |         |                                               |         |
| ‡ Total triglycerides                     | -0.0004 (-0.11; 0.11) | 0.995   | -0.01 (-0.12; 0.11)                  | 0.910   | 0.04 (-0.07; 0.14)                            | 0.487   |
| ‡ VLDL TG                                 | 0.002 (-0.11; 0.12)   | 0.972   | -0.03 (-0.14; 0.09)                  | 0.657   | 0.04 (-0.07; 0.15)                            | 0.486   |
| IDL TG                                    | 0.10 (0.01; 0.19)     | 0.037   | -0.08 (-0.18; 0.01)                  | 0.072   | -0.09 (-0.18; -0.002)                         | 0.046   |
| LDL TG                                    | 0.08 (-0.02; 0.17)    | 0.102   | -0.06 (-0.16; 0.03)                  | 0.165   | -0.07 (-0.16; 0.02)                           | 0.113   |
| HDL TG                                    | -0.05 (-0.14; 0.05)   | 0.311   | 0.02 (-0.08; 0.11)                   | 0.687   | 0.07 (-0.02; 0.16)                            | 0.115   |

|                             |                       |          |                      |         |                      |         |
|-----------------------------|-----------------------|----------|----------------------|---------|----------------------|---------|
| <b>Cholesterol</b>          |                       |          |                      |         |                      |         |
| Total cholesterol           | 0.003 (-0.10; 0.11)   | 0.959    | -0.003 (-0.11; 0.11) | 0.956   | -0.002 (-0.11; 0.10) | 0.971   |
| VLDL-C                      | -0.03 (-0.12; 0.07)   | 0.616    | 0.01 (-0.09; 0.11)   | 0.874   | 0.04 (-0.06; 0.14)   | 0.405   |
| IDL-C                       | 0.02 (-0.08; 0.13)    | 0.658    | -0.01 (-0.11; 0.10)  | 0.873   | -0.04 (-0.14; 0.06)  | 0.478   |
| LDL-C                       | 0.02 (-0.09; 0.12)    | 0.735    | -0.004 (-0.11; 0.10) | 0.948   | -0.03 (-0.13; 0.07)  | 0.538   |
| HDL-C                       | -0.02 (-0.13; 0.09)   | 0.758    | -0.01 (-0.12; 0.11)  | 0.925   | 0.04 (-0.07; 0.15)   | 0.448   |
| HDL2-C                      | -0.02 (-0.13; 0.09)   | 0.739    | -0.003 (-0.11; 0.11) | 0.953   | 0.04 (-0.06; 0.15)   | 0.444   |
| HDL3-C                      | 0.002 (-0.11; 0.12)   | 0.971    | -0.02 (-0.14; 0.09)  | 0.699   | 0.02 (-0.09; 0.13)   | 0.673   |
| Esterified cholesterol      | 0.002 (-0.10; 0.11)   | 0.967    | -0.002 (-0.11; 0.11) | 0.970   | -0.002 (-0.11; 0.10) | 0.970   |
| Free cholesterol            | 0.004 (-0.10; 0.11)   | 0.939    | -0.01 (-0.11; 0.10)  | 0.923   | -0.002 (-0.10; 0.10) | 0.972   |
| <b>Fatty acids</b>          |                       |          |                      |         |                      |         |
| Total fatty acids           | -0.03 (-0.13; 0.07)   | 0.591    | 0.004 (-0.10; 0.11)  | 0.945   | 0.05 (-0.05; 0.15)   | 0.306   |
| Unsaturation degree         | -0.02 (-0.12; 0.09)   | 0.757    | 0.03 (-0.08; 0.13)   | 0.600   | -0.002 (-0.10; 0.10) | 0.972   |
| Omega-3 FA                  | -0.05 (-0.15; 0.06)   | 0.376    | 0.03 (-0.07; 0.14)   | 0.551   | 0.06 (-0.05; 0.16)   | 0.288   |
| Omega-3 FA ratio            | -0.05 (-0.17; 0.06)   | 0.352    | 0.05 (-0.06; 0.17)   | 0.372   | 0.04 (-0.07; 0.15)   | 0.440   |
| Docosahexaenoic acid        | -0.0004 (-0.11; 0.11) | 0.994    | -0.01 (-0.12; 0.09)  | 0.793   | 0.02 (-0.08; 0.12)   | 0.724   |
| Polyunsaturated FA          | -0.02 (-0.13; 0.08)   | 0.645    | 0.01 (-0.10; 0.11)   | 0.881   | 0.04 (-0.06; 0.14)   | 0.448   |
| Omega-6 FA                  | -0.02 (-0.13; 0.09)   | 0.710    | 0.004 (-0.10; 0.11)  | 0.948   | 0.04 (-0.07; 0.14)   | 0.494   |
| Omega-6 FA ratio            | 0.02 (-0.08; 0.12)    | 0.701    | 0.002 (-0.10; 0.11)  | 0.974   | -0.04 (-0.14; 0.06)  | 0.403   |
| Linoleic acid               | -0.03 (-0.13; 0.08)   | 0.632    | 0.01 (-0.10; 0.11)   | 0.904   | 0.04 (-0.06; 0.15)   | 0.404   |
| Saturated FA                | -0.01 (-0.11; 0.09)   | 0.806    | -0.01 (-0.11; 0.09)  | 0.856   | 0.04 (-0.06; 0.14)   | 0.458   |
| Saturated FA ratio          | 0.12 (0.001; 0.24)    | 0.048    | -0.11 (-0.23; 0.01)  | 0.085   | -0.11 (-0.23; 0.01)  | 0.061   |
| Monounsaturated FA          | -0.04 (-0.14; 0.06)   | 0.402    | 0.01 (-0.09; 0.11)   | 0.817   | 0.07 (-0.03; 0.17)   | 0.151   |
| <b>Metabolic substrates</b> |                       |          |                      |         |                      |         |
| Glucose                     | -0.11 (-0.22; -0.01)  | 0.030    | 0.14 (0.03; 0.24)    | 0.012   | 0.06 (-0.04; 0.17)   | 0.213   |
| Glycerola                   | 0.02 (-0.08; 0.13)    | 0.659    | 0.005 (-0.10; 0.11)  | 0.932   | -0.05 (-0.15; 0.05)  | 0.306   |
| Acetoacetatea               | -0.04 (-0.15; 0.08)   | 0.530    | 0.04 (-0.08; 0.16)   | 0.514   | 0.03 (-0.09; 0.14)   | 0.647   |
| ‡ 3-hydroxybuturate         | 0.11 (0.03; 0.20)     | 0.009    | -0.10 (-0.19; -0.02) | 0.019   | -0.12 (-0.20; -0.04) | 0.003   |
| ‡ Acetate                   | 0.20 (0.09; 0.30)     | <0.001 * | -0.18 (-0.29; -0.07) | 0.001 * | -0.17 (-0.28; -0.06) | 0.002 * |
| Citrate                     | -0.001 (-0.12; 0.12)  | 0.992    | -0.02 (-0.14; 0.10)  | 0.725   | 0.03 (-0.09; 0.14)   | 0.635   |
| Lactatea                    | 0.02 (-0.09; 0.12)    | 0.740    | -0.05 (-0.15; 0.06)  | 0.384   | 0.02 (-0.08; 0.12)   | 0.663   |
| Pyruvate                    | 0.02 (-0.09; 0.12)    | 0.740    | 0.03 (-0.08; 0.13)   | 0.593   | -0.07 (-0.17; 0.03)  | 0.168   |
| <b>Amino acids</b>          |                       |          |                      |         |                      |         |
| Isoleucine (BCAA)           | 0.003 (-0.11; 0.11)   | 0.950    | -0.02 (-0.14; 0.09)  | 0.687   | 0.02 (-0.09; 0.13)   | 0.696   |
| Leucine (BCAA)              | 0.04 (-0.07; 0.15)    | 0.522    | -0.05 (-0.16; 0.06)  | 0.345   | -0.01 (-0.11; 0.10)  | 0.915   |
| Valine                      | 0.11 (-0.002; 0.22)   | 0.055    | -0.11 (-0.23; 0.002) | 0.054   | -0.08 (-0.19; 0.03)  | 0.138   |
| Alanine                     | -0.07 (-0.18; 0.04)   | 0.231    | 0.03 (-0.08; 0.14)   | 0.634   | 0.10 (-0.01; 0.21)   | 0.062   |
| Glutamine                   | -0.13 (-0.22; -0.03)  | 0.012    | 0.15 (0.05; 0.25)    | 0.004   | 0.07 (-0.02; 0.17)   | 0.145   |
| Glycinea                    | -0.04 (-0.15; 0.07)   | 0.451    | 0.05 (-0.06; 0.17)   | 0.374   | 0.02 (-0.09; 0.13)   | 0.680   |

|                      |                      |       |                     |       |                     |       |
|----------------------|----------------------|-------|---------------------|-------|---------------------|-------|
| Histidine            | -0.01 (-0.12; 0.11)  | 0.932 | -0.03 (-0.15; 0.09) | 0.626 | 0.05 (-0.07; 0.16)  | 0.420 |
| Phenylalanine        | -0.07 (-0.18; 0.03)  | 0.151 | 0.05 (-0.05; 0.16)  | 0.309 | 0.08 (-0.02; 0.18)  | 0.097 |
| Tyrosine             | -0.17 (-0.28; -0.06) | 0.003 | 0.15 (0.04; 0.26)   | 0.008 | 0.15 (0.04; 0.26)   | 0.006 |
| <b>Miscellaneous</b> |                      |       |                     |       |                     |       |
| Glycoproteins        | -0.06 (-0.16; 0.03)  | 0.190 | 0.07 (-0.03; 0.16)  | 0.184 | 0.05 (-0.05; 0.14)  | 0.319 |
| Creatinine           | 0.07 (-0.05; 0.18)   | 0.274 | -0.09 (-0.20; 0.03) | 0.159 | -0.03 (-0.14; 0.09) | 0.656 |
| Albumin              | 0.02 (-0.08; 0.12)   | 0.710 | -0.05 (-0.16; 0.05) | 0.308 | 0.03 (-0.07; 0.13)  | 0.585 |

‡ Quantile regression models applied,\*  $p \leq 0.002$ .

Table S4: Standardized single regression coefficients ( $\beta$ ) of sedentary time and physical activity intensities with their 95% confidence intervals (CI) from age, education, smoking, alcohol, nutrition and aerobic fitness-adjusted linear regression models for serum metabolome.

| Metabolome measure                        | Sedentary time      |         | Light intensity physical activity |         | Moderate-to-vigorous physical activity |         |
|-------------------------------------------|---------------------|---------|-----------------------------------|---------|----------------------------------------|---------|
|                                           | $\beta$ (95% CI)    | p-value | $\beta$ (95% CI)                  | p-value | $\beta$ (95% CI)                       | p-value |
| <b>Lipoprotein particle concentration</b> |                     |         |                                   |         |                                        |         |
| ‡Extremely large VLDL                     | -0.02 (-0.11; 0.06) | 0.597   | 0.005 (-0.08; 0.09)               | 0.912   | 0.06 (-0.03; 0.14)                     | 0.193   |
| ‡Very large VLDL                          | -0.01 (-0.12; 0.10) | 0.844   | 0.01 (-0.10; 0.11)                | 0.898   | 0.06 (-0.05; 0.17)                     | 0.282   |
| ‡Large VLDL                               | 0.004 (-0.12; 0.12) | 0.952   | -0.01 (-0.13; 0.10)               | 0.803   | 0.05 (-0.06; 0.17)                     | 0.347   |
| ‡Medium VLDL                              | -0.01 (-0.13; 0.11) | 0.831   | -0.02 (-0.14; 0.10)               | 0.733   | 0.03 (-0.08; 0.15)                     | 0.577   |
| Small VLDL                                | -0.03 (-0.13; 0.06) | 0.506   | 0.00 (-0.10; 0.10)                | 0.999   | 0.07 (-0.03; 0.16)                     | 0.162   |
| Very small VLDL                           | 0.03 (-0.08; 0.13)  | 0.626   | -0.03 (-0.13; 0.07)               | 0.531   | -0.01 (-0.11; 0.09)                    | 0.848   |
| IDL                                       | 0.03 (-0.07; 0.14)  | 0.528   | -0.03 (-0.13; 0.08)               | 0.624   | -0.04 (-0.14; 0.07)                    | 0.501   |
| Large LDL                                 | 0.03 (-0.08; 0.14)  | 0.604   | -0.02 (-0.13; 0.09)               | 0.703   | -0.03 (-0.14; 0.07)                    | 0.560   |
| Medium LDL                                | 0.02 (-0.08; 0.13)  | 0.665   | -0.02 (-0.13; 0.09)               | 0.738   | -0.02 (-0.13; 0.08)                    | 0.642   |
| Small LDL                                 | 0.02 (-0.09; 0.13)  | 0.713   | -0.02 (-0.13; 0.09)               | 0.729   | -0.02 (-0.12; 0.09)                    | 0.755   |
| Very large HDL                            | 0.03 (-0.08; 0.14)  | 0.595   | -0.04 (-0.15; 0.07)               | 0.524   | -0.01 (-0.12; 0.09)                    | 0.787   |
| Large HDL                                 | 0.01 (-0.09; 0.12)  | 0.798   | -0.02 (-0.13; 0.08)               | 0.679   | 0.001 (-0.10; 0.10)                    | 0.991   |
| Medium HDL                                | -0.03 (-0.14; 0.09) | 0.666   | 0.01 (-0.10; 0.13)                | 0.810   | 0.03 (-0.08; 0.15)                     | 0.557   |
| Small HDL                                 | -0.03 (-0.15; 0.09) | 0.603   | 0.02 (-0.09; 0.14)                | 0.701   | 0.03 (-0.08; 0.15)                     | 0.560   |
| <b>Lipoprotein particle size</b>          |                     |         |                                   |         |                                        |         |
| VLDL diameter                             | -0.07 (-0.18; 0.04) | 0.236   | 0.03 (-0.09; 0.14)                | 0.625   | 0.10 (-0.01; 0.22)                     | 0.066   |
| LDL diameter                              | 0.02 (-0.10; 0.13)  | 0.775   | 0.02 (-0.10; 0.14)                | 0.741   | -0.06 (-0.18; 0.05)                    | 0.299   |
| HDL diameter                              | 0.03 (-0.08; 0.13)  | 0.618   | -0.03 (-0.13; 0.08)               | 0.587   | -0.02 (-0.12; 0.09)                    | 0.744   |
| <b>Apolipoproteins</b>                    |                     |         |                                   |         |                                        |         |
| ApoA1                                     | -0.02 (-0.13; 0.10) | 0.784   | -0.01 (-0.12; 0.11)               | 0.902   | 0.04 (-0.07; 0.16)                     | 0.460   |

|                             |                      |       |                      |       |                      |       |
|-----------------------------|----------------------|-------|----------------------|-------|----------------------|-------|
| ApoB                        | -0.01 (-0.11; 0.10)  | 0.884 | -0.10 (-0.11; 0.09)  | 0.856 | 0.03 (-0.07; 0.13)   | 0.585 |
| ApoB ApoA1 ratio            | -0.002 (-0.10; 0.10) | 0.973 | -0.01 (-0.11; 0.09)  | 0.870 | 0.01 (-0.08; 0.11)   | 0.774 |
| <b>Triglycerides</b>        |                      |       |                      |       |                      |       |
| ‡Total triglycerides        | 0.01 (-0.12; 0.13)   | 0.914 | -0.04 (-0.16; 0.08)  | 0.510 | 0.03 (-0.09; 0.15)   | 0.662 |
| ‡VLDL TG                    | -0.004 (-0.12; 0.12) | 0.946 | -0.05 (-0.17; 0.07)  | 0.424 | 0.05 (-0.07; 0.16)   | 0.442 |
| IDL TG                      | 0.09 (-0.003; 0.19)  | 0.057 | -0.09 (-0.18; 0.01)  | 0.066 | -0.07 (-0.17; 0.02)  | 0.121 |
| LDL TG                      | 0.08 (-0.02; 0.17)   | 0.113 | -0.07 (-0.17; 0.02)  | 0.128 | -0.06 (-0.16; 0.03)  | 0.195 |
| HDL TG                      | -0.05 (-0.15; 0.05)  | 0.347 | 0.01 (-0.09; 0.11)   | 0.870 | 0.09 (-0.01; 0.18)   | 0.078 |
| <b>Cholesterol</b>          |                      |       |                      |       |                      |       |
| Total cholesterol           | 0.01 (-0.10; 0.12)   | 0.794 | -0.02 (-0.13; 0.09)  | 0.741 | -0.01 (-0.11; 0.10)  | 0.915 |
| VLDL-C                      | -0.04 (-0.14; 0.07)  | 0.498 | 0.004 (-0.10; 0.11)  | 0.943 | 0.07 (-0.03; 0.17)   | 0.184 |
| IDL-C                       | 0.03 (-0.08; 0.14)   | 0.600 | -0.02 (-0.13; 0.09)  | 0.715 | -0.03 (-0.14; 0.07)  | 0.538 |
| LDL-C                       | 0.03 (-0.08; 0.13)   | 0.645 | -0.02 (-0.13; 0.09)  | 0.760 | -0.03 (-0.14; 0.08)  | 0.575 |
| HDL-C                       | 0.02 (-0.10; 0.13)   | 0.784 | -0.02 (-0.13; 0.09)  | 0.719 | -0.01 (-0.11; 0.10)  | 0.922 |
| HDL2-C                      | 0.01 (-0.10; 0.12)   | 0.819 | -0.02 (-0.13; 0.09)  | 0.770 | -0.01 (-0.11; 0.10)  | 0.925 |
| HDL3-C                      | 0.03 (-0.08; 0.15)   | 0.570 | -0.05 (-0.16; 0.07)  | 0.409 | -0.01 (-0.12; 0.11)  | 0.922 |
| Esterified cholesterol      | 0.01 (-0.10; 0.12)   | 0.800 | -0.02 (-0.13; 0.09)  | 0.754 | -0.01 (-0.12; 0.10)  | 0.909 |
| Free cholesterol            | 0.02 (-0.09; 0.12)   | 0.783 | -0.02 (-0.13; 0.09)  | 0.711 | -0.005 (-0.11; 0.10) | 0.931 |
| <b>Fatty acids</b>          |                      |       |                      |       |                      |       |
| Total fatty acids           | -0.03 (-0.13; 0.08)  | 0.601 | -0.01 (-0.11; 0.10)  | 0.898 | 0.07 (-0.04; 0.17)   | 0.205 |
| Unsaturation degree         | 0.01 (-0.10; 0.11)   | 0.911 | 0.02 (-0.08; 0.13)   | 0.674 | -0.04 (-0.16; 0.08)  | 0.510 |
| Omega-3 FA                  | -0.04 (-0.15; 0.07)  | 0.451 | 0.02 (-0.09; 0.13)   | 0.698 | 0.06 (-0.05; 0.17)   | 0.286 |
| Omega-3 FA ratio            | -0.04 (-0.15; 0.07)  | 0.484 | 0.04 (-0.07; 0.16)   | 0.441 | 0.03 (-0.09; 0.14)   | 0.655 |
| Docosahexaenoic acid        | 0.001 (-0.11; 0.11)  | 0.987 | -0.02 (-0.13; 0.09)  | 0.736 | 0.02 (-0.09; 0.13)   | 0.680 |
| Polyunsaturated FA          | -0.01 (-0.12; 0.09)  | 0.770 | -0.01 (-0.12; 0.10)  | 0.910 | 0.04 (-0.07; 0.15)   | 0.445 |
| Omega-6 FA                  | -0.01 (-0.12; 0.10)  | 0.840 | -0.01 (-0.12; 0.10)  | 0.841 | 0.04 (-0.07; 0.15)   | 0.490 |
| Omega-6 FA ratio            | 0.04 (-0.06; 0.15)   | 0.429 | -0.003 (-0.11; 0.10) | 0.958 | -0.09 (-0.19; 0.02)  | 0.112 |
| Linoleic acid               | -0.02 (-0.13; 0.09)  | 0.785 | -0.01 (-0.12; 0.10)  | 0.861 | 0.04 (-0.06; 0.15)   | 0.421 |
| Saturated FA                | -0.02 (-0.12; 0.09)  | 0.773 | -0.02 (-0.12; 0.09)  | 0.739 | 0.06 (-0.05; 0.16)   | 0.295 |
| Saturated FA ratio          | 0.10 (-0.02; 0.22)   | 0.107 | -0.09 (-0.21; 0.03)  | 0.150 | -0.09 (-0.21; 0.03)  | 0.143 |
| Monounsaturated FA          | -0.05 (-0.16; 0.06)  | 0.357 | 0.004 (-0.10; 0.11)  | 0.938 | 0.10 (-0.01; 0.20)   | 0.067 |
| <b>Metabolic substrates</b> |                      |       |                      |       |                      |       |
| Glucose                     | -0.13 (-0.23; -0.02) | 0.019 | 0.14 (0.03; 0.25)    | 0.010 | 0.08 (-0.03; 0.18)   | 0.138 |
| Glycerola                   | 0.01 (-0.10; 0.12)   | 0.871 | 0.005 (-0.10; 0.11)  | 0.929 | -0.02 (-0.13; 0.08)  | 0.647 |
| Acetoacetatea               | -0.03 (-0.15; 0.09)  | 0.584 | 0.03 (-0.08; 0.15)   | 0.571 | 0.02 (-0.09; 0.14)   | 0.692 |
| ‡3-hydroxybuturate          | 0.11 (0.03; 0.19)    | 0.008 | -0.10 (-0.19; -0.01) | 0.026 | -0.11 (-0.19; -0.04) | 0.005 |
| ‡Acetate                    | 0.15 (0.03; 0.27)    | 0.012 | -0.16 (-0.27; -0.05) | 0.006 | -0.14 (-0.25; -0.03) | 0.013 |
| Citrate                     | 0.01 (-0.11; 0.13)   | 0.863 | -0.03 (-0.15; 0.09)  | 0.624 | 0.02 (-0.10; 0.14)   | 0.773 |

|                      |                      |       |                      |       |                      |       |
|----------------------|----------------------|-------|----------------------|-------|----------------------|-------|
| Lactate              | 0.01 (-0.09; 0.12)   | 0.816 | -0.05 (-0.16; 0.06)  | 0.355 | 0.04 (-0.07; 0.14)   | 0.460 |
| Pyruvate             | -0.01 (-0.11; 0.10)  | 0.890 | 0.04 (-0.06; 0.15)   | 0.404 | -0.04 (-0.15; 0.06)  | 0.415 |
| <b>Amino acids</b>   |                      |       |                      |       |                      |       |
| Isoleucine (BCAA)    | -0.01 (-0.13; 0.10)  | 0.822 | -0.02 (-0.14; 0.09)  | 0.699 | 0.06 (-0.06; 0.17)   | 0.325 |
| Leucine (BCAA)       | 0.02 (-0.09; 0.13)   | 0.744 | -0.05 (-0.17; 0.06)  | 0.371 | 0.03 (-0.08; 0.14)   | 0.617 |
| Valine               | 0.10 (-0.01; 0.21)   | 0.088 | -0.11 (-0.22; 0.005) | 0.060 | -0.06 (-0.18; 0.05)  | 0.276 |
| Alanine              | -0.05 (-0.17; 0.06)  | 0.386 | 0.004 (-0.11; 0.12)  | 0.942 | 0.10 (-0.01; 0.22)   | 0.085 |
| Glutamine            | -0.11 (-0.21; -0.01) | 0.036 | 0.14 (0.04; 0.24)    | 0.007 | 0.04 (-0.06; 0.14)   | 0.421 |
| Glycine              | -0.03 (-0.14; 0.09)  | 0.665 | 0.04 (-0.07; 0.16)   | 0.485 | -0.001 (-0.11; 0.11) | 0.985 |
| Histidine            | 0.002 (-0.12; 0.12)  | 0.978 | -0.04 (-0.16; 0.08)  | 0.524 | 0.05 (-0.07; 0.17)   | 0.432 |
| Phenylalanine        | -0.08 (-0.19; 0.04)  | 0.184 | 0.04 (-0.07; 0.15)   | 0.489 | 0.10 (-0.01; 0.21)   | 0.062 |
| Tyrosine             | -0.16 (-0.28; -0.05) | 0.006 | 0.13 (0.02; 0.25)    | 0.024 | 0.16 (0.05; 0.28)    | 0.005 |
| <b>Miscellaneous</b> |                      |       |                      |       |                      |       |
| Glycoproteins        | -0.09 (-0.19; 0.01)  | 0.082 | 0.07 (-0.03; 0.17)   | 0.177 | 0.09 (-0.01; 0.19)   | 0.063 |
| Creatinine           | 0.06 (-0.06; 0.17)   | 0.351 | -0.08 (-0.20; 0.04)  | 0.195 | -0.01 (-0.13; 0.10)  | 0.810 |
| Albumin              | 0.03 (-0.07; 0.14)   | 0.563 | -0.06 (-0.17; 0.04)  | 0.241 | 0.02 (-0.09; 0.12)   | 0.736 |

‡ Quantile regression models applied, \*  $p \leq 0.002$ .
